# Supplementary material for: A Ceratopsian Dinosaur from the Lower Cretaceous of Western North America, and the Biogeography of Neoceratopsia
Source: PubMed Central journal article supplement (PMC4262212; doi:10.1371/journal.pone.0112055), 2014-12-10
Supplement: pone.0112055.s001.pdf [file pone.0112055.s001.pdf]

## File S1. Supporting Information

### A Ceratopsian Dinosaur from the Lower Cretaceous of Western North America, and the Biogeography of Neoceratopsia

Andrew A. Farke<sup>1,3\*</sup>, W. Desmond Maxwell<sup>2,3</sup>, Richard L. Cifelli<sup>3</sup>, Mathew J. Wedel<sup>4,3</sup>

<sup>1</sup>Raymond M. Alf Museum of Paleontology, Claremont, California, United States of America;

<sup>2</sup>Department of Biological Sciences, University of the Pacific, Stockton, California, United States of America; <sup>3</sup>Sam Noble Oklahoma Museum of Natural History, Norman, Oklahoma, United States of America; <sup>4</sup>College of Podiatric Medicine, Western University of Health Sciences, Pomona, California,

United States of America

\*Email: afarke@webb.org

#### Contents

**Text S1.** Character list used for phylogenetic analysis.

**Text S2.** Codings for phylogenetic analysis, in TNT format. See also File S2.

**Text S3.** Codings for phylogenetic analysis, in TNT format, with ontogeny-dependent characters of *Aquilops* scored as unknown. See also File S3.

**Figure S1.** Most parsimonious tree, recovering *Ajkaceratops* as most basal neoceratopsian, with synapomorphy list.

**Figure S2.** Most parsimonious tree, recovering *Ajkaceratops* as sister to *Bagaceratops*, with synapomorphy list.

**Figure S3.** Bootstrap and Bremer support values for phylogenetic hypothesis.

**Figure S4.** Strict consensus of 18 equally parsimonious trees, with selected ontogenetic-variant characters for *Aquilops americanus* scored as unknown, assuming that the holotype is a juvenile.

**Figure S5.** Strict consensus of 18 equally parsimonious trees, with selected ontogenetic-variant characters for *Aquilops americanus* scored as unknown, assuming that the holotype is a juvenile. In this version of the tree, the wildcard taxon *Ajkaceratops* has been pruned *post hoc*.

**Figure S6.** Phylogenetic tree recovering *Ajkaceratops* as sister to *Bagaceratops*, used for DEC modeling, with nodal numbers referenced in results (Table S1).

**Table S1.** Temporal calibrations used for DEC analysis.

**Figure S7.** Summary figure of DEC modeling results.

**Table S2.** Node-by-node results for DEC analysis.

**Literature Cited**

**Text S1. Character list used for phylogenetic analysis.** Characters 1–133 are taken directly from Makovicky and Norell (2006; with 140 modified following character 134 of Lee et al. 2011), characters 134–147 from Makovicky (2010), characters 148 and 149 from Lee et al. (2011; corresponding to their characters 135 and 136); characters 150 and 151 from Ryan et al. (2012). The full character list is provided here as a convenience to the reader; please see the main text and referenced publications for additional explanations and the history of usage for each character.

1. Head size small relative to body (0) or large relative to body (1).
2. Head shape in dorsal view: elongate, ovoid (0), or triangular, wide over jugals (1).
3. Orbit diameter more than 20% of skull length (0) or less (1).
4. Preorbital region more than 40% (0) or less than 40% (1) the length of the skull.
5. Tip of rostral low and level with maxillary tooth row (1) or raised and dorsal to maxillary tooth row (1).
6. Rostral bone forming beak absent (0) or present (1).
7. Rostral ventral (buccal) process absent (0) or present (1).
8. Anterior face of rostral round, convex (0) or sharply keeled (1).
9. Premaxillary palatal region flat in ventral view (0) or vaulted dorsally (1).
10. Relative height of premaxilla (snout) to orbital region low (0) or deep (1).
11. Premaxilla–prefrontal contact absent (0) or present (1).
12. Convex buccal process anterior to maxillary tooth row formed by premaxilla or premaxilla and maxilla absent (0) or present (1).
13. Premaxilla–maxilla buccal margin relatively straight in ventral view, tooth rows/buccal margins converge rostrally (0) or buccal margin sinuous in ventral view, with premaxillary palatal region flaring widely rostral to tooth row (1).
14. Anterior end of the nasal (internarial bar) above (0) or below and far rostral to the external naris (1).
15. Nares position close to buccal margin (0) or dorsal, away from buccal margin (1) or very far dorsal, level with upper part of orbit (2).
16. Ventral border of external nares significantly below (0), about the level of (1), or significantly above (2) lower rim of infratemporal fenestra.
17. Large depression excavating premaxilla anteroventral to naris absent (0) or present (1).
18. Nasal horn absent (0), small (1), or large (2).
19. Naris width (excluding narial depression) less than 10% of skull length (0) or more than 10% of skull length (1).
20. Position of choana on palate: anterior to maxillary tooth row (0) or level with maxillary tooth row (1).
21. Maxillae from opposite sides separated by vomers at anterior border of the internal choanae (0) or maxillae contact each other anterior to choanae in palatal view and tip of vomer obscured from view (1).
22. Dentigerous margin of maxilla straight (0) or ventrally convex (1).
23. Antorbital fossa reduced or absent (0) or large and triangular or rounded in shape (1).
24. Eminence or tubercle on the rim of the buccal emargination of the maxilla near the junction with the jugal absent (0) or present (1).
25. Palpebral free, articulating with lacrimal (0) or fused to orbital margin (1).
26. Jugal–lacrimal contact reduced (0) or expanded (1).
27. Jugal horns absent (0) or present and laterally directed (1) or present and ventrally directed (2).
28. Jugal suborbital ramus not as deep as subtemporal ramus (0) or suborbital ramus as deep or deeper than orbital ramus (1).
29. Epijugal ossification absent (0) or present (1).

30. Epijugal position on jugal: along dorsal edge of horn (epijugal trapezoidal) (0) or capping end of horn (epijugal conical) (1).
31. Orbital horns absent (0) or present (1).
32. Postorbital inverted L-shaped (0) or triangular and platelike (1).
33. Postorbital with dorsal part rounded and overhanging lateral edge of supratemporal fenestra (0) or with concave dorsal shelf bordering supratemporal fenestra (1).
34. Laterotemporal fenestra with postorbital participation in margin (0), postorbital excluded from margin (1), or jugal–squamosal contact very wide and postorbital situated far from fenestra (2).
35. Laterotemporal fenestra width more than 10% of skull length (0) or less than 10% of skull length (1).
36. Squamosal subtriangular in lateral view (0) or T-shaped, with postquadratic process (1).
37. Temporal process of squamosal simple (0) or deeply bifurcate around temporal process of postorbital (1).
38. Posterior edge of squamosal angled anteromedially (0) or posteromedially, squamosal contributing lateral portion of frill margin (1).
39. Temporal bars of squamosals parallel (0) or posteriorly divergent (1).
40. Quadratojugal mediolaterally flattened (0) or transversely expanded and triangular in coronal section (1) or triangular in coronal section, but with slender anterior prong articulating with jugal (2).
41. Quadrate shaft anteriorly convex in lateral view (0) or straight (1).
42. Elongate parasagittal process of the palatine absent (0) or present (1).
43. Ectopterygoid exposed in palatal view (0) or reduced and concealed in palatal view (1).
44. Ectopterygoid contacts jugal (0) or ectopterygoid reduced and restricted to contact with maxilla (1).
45. Pterygopalatine foramen (modified suborbital fenestra) large (0) or diminutive (1).
46. Ventral ridge on mandibular process of pterygoid defining "Eustachian canal" absent (0) or present (1).
47. Pterygoid–maxilla contact at posterior end of tooth row absent (0) or present (1).
48. Prominent posterior midline process on pterygoid absent (0) or present (1).
49. Pterygoid mandibular process short (0) or long, extending well below maxillary tooth row (1).
50. Pterygoid mandibular process formed only by pterygoid (0) or jointly by pterygoid and ectopterygoid (1).
51. Parieto-frontal contact flat (0), depressed (1), or invaginated by fontanelle (2).
52. Parieto-squamosal frill absent (0) or parietal frill less than 70% of basal length of skull (1) or more than 70% of basal length (2).
53. Dorsal edge of squamosal temporal bar curves medially at the posterior end, arcing confluent into posterior frill margin (0) or dorsal edge of squamosal meets posterior margin of frill at acute angle (1).
54. Frill solid (0) or fenestrated near posterior margin (1).
55. Distinctive indentation on midline of the posterior parietals present (0) or absent (1).
56. Epoccipital ossifications/frill scallops absent (0) or present (1).
57. Basioccipital participates in foramen magnum (0) or basioccipital is excluded from foramen magnum and exoccipitals form less than onethird of condyle (1) or exoccipitals form about half or more of occipital condyle (2).
58. Basioccipital excluded from basal tubera by basisphenoid and limited to occipital midline (0) or basioccipital tubera present (1).
59. Basipterygoid process orientation anterolateral (0), ventral (1), or posteroventral (2) when braincase is oriented with condyle pointing posteriorly.
60. Basioccipital tubera flat, in plane with basioccipital plate (0) or everted posterolaterally,

- forming lip beneath occipital condyle (1).
61. Notch between posteroventral edge of basisphenoid and base of basiptyergoid process deep (0) or notch shallow and base of basiptyergoid process close to basioccipital tubera (1).
  62. Exoccipital with three exits for cranial nerves X–XII near occipital condyle (0) or with two exits (1).
  63. Exoccipital–quadrates separated by ventral flange of squamosal (0) or in contact (1).
  64. Paroccipital processes deep (height  $\geq$  K length) (0) or significantly narrower (1).
  65. Supraoccipital participates in dorsal margin of foramen magnum (0) or excluded from foramen magnum by exoccipitals (1).
  66. Supraoccipital anteriorly inclined relative to basioccipital (0) or in same plane as posterior face of basioccipital (1).
  67. Supraoccipital shape tall, triangular (0) or wider than tall, trapezoid (1) or square (2).
  68. Tip of predentary shallow (0) or scooplike (1).
  69. Predentary with rounded anterior margin and distally broad posteroventral process (0) or with pointed anterior margin and distally narrow posteroventral process (1).
  70. Predentary less than two-thirds of dentary length (0) or equal to or more than two-thirds of dentary length (1).
  71. Predentary buccal margin sharp (0) or with a rounded, beveled edge (1) or with grooved, triturating edge (2).
  72. Tip of dentary smooth (0) or grooved dorsally for reception of the lateral process of the predentary (1) or bears large pit for reception of the lateral process of the predentary (2).
  73. Dentary symphyseal area small (0) or large, forming strong immobile bond with participation of splenial (1).
  74. Diastema between predentary and first dentary tooth absent (0) or present (1).
  75. Ventral margin of dentary curved (0) or straight (1) in lateral view.
  76. Dentary flange absent (0) or present along ventral edge (1).
  77. Prominent medial expansion of the central mandible in the middle of the tooth row formed by wide Meckelian groove separating tooth-bearing part of the jaw from external surface absent (0) or present (1).
  78. Labial face of dentary smooth below tooth row (0) or rugose and sculpted (1).
  79. Contact between dentary and prearticular absent (0) or present (1).
  80. Posterior end of splenial simple or with shallow dent (0) or with bifid overlap of angular (1).
  81. Distal end of coronoid process rounded (0) or with anterior expansion (1).
  82. Coronoid process positioned close to main axis of dentary and posterior to tooth row (0) or set lateral to tooth row, and end of tooth row covered by anterior part of coronoid process (1) or tooth row level with posterior edge of coronoid process (2).
  83. Coronoid straplike and with subequal depth throughout (0) or with lobate, highly expanded dorsal end much deeper than ventral end that slots between splenial and dentary (1).
  84. Surangular without distinct lateral ridge or shelf overhanging angular (0) or shelf/ridge present (1).
  85. Lateral surface of surangular flat or only weakly convex (0) or with pronounced laterally convex curvature (in the transverse plane) between the coronoid process and glenoid region (1).
  86. Tab on surangular forming lateral wall to glenoid cotyle absent (0) or present (1).
  87. Angular without one or more small, lateral tubercles along ventral rim below glenoid articulation (0) or tubercles present (1).
  88. Lateral surface of angular flat or slightly convex (0) or angular bears a raised emargination along posteroventral margin of mandible, lateral surface distinctly concave (1).
  89. Angular–surangular–dentary contact triradiate (0) or surangular with long ventral process overlapping angular, dentary–surangular and angular–surangular sutures form acute angle on

- lateral face of mandible (1).
90. Mandibular glenoid narrow and flush with medial margin of surangular flange in dorsal view (0) or glenoid region medially expanded and forming lingual process in dorsal view (1).
  91. Surface of prearticular and articular below glenoid smooth (0) or with wide, semicircular ventral process near medial face of glenoid (1).
  92. Retroarticular process long (0) or short or absent (1).
  93. Three or more teeth in premaxilla (0) or two teeth in premaxilla (1) or 1 tooth in premaxilla (2) or premaxilla edentulous (3).
  94. Premaxillary teeth with carinae, and in some cases serrations (0) or premaxillary teeth peglike, crown without carinae (1).
  95. Teeth with single roots (0) or with double roots (1).
  96. Cheek teeth spaced (0) or closely appressed with determinate eruption and replacement pattern (1).
  97. Teeth occlude at an oblique angle (0) or at a vertical angle (1) or at a vertical angle, but dentary teeth have a horizontal shelf on the labial face (2).
  98. Teeth without distinct median primary ridge (0) or with very weak and wide median ridge on at least some maxillary teeth (1) or all maxillary and dentary teeth with distinct primary ridge (2).
  99. Base of primary ridge confluent with the cingulum on maxillary teeth (0) or base of primary ridge set back from cingulum, which forms a continuous ridge at the crown base (1).
  100. Pronounced cingula on cheek teeth absent (0) or present (1).
  101. Tooth row double, with only one replacement tooth present at a time (0) or battery-like with multiple ( $\geq 3$ ) rows of replacement teeth (1).
  102. Both lingual and buccal sides of teeth covered with enamel (0) or enamel restricted to lateral side of maxillary and medial side of dentary teeth (1).
  103. Dentary tooth crowns with continuous, smooth root crown transition (0) or bulbous expansion at root-crown transition on labial side of tooth, sometimes worn to form notch or shelf (1).
  104. Number of alveoli in dentary less than 20 (0) or more than 20 (1).
  105. Cheek teeth with cylindrical roots (0) or roots with mesial and distal faces flattened to slightly grooved (1).
  106. Tooth crowns radiate or pennate in lateral view (0) or crowns ovate in lateral view (1).
  107. Atlas intercentrum semicircular (0) or disc shaped (1).
  108. Atlas intercentrum not fused to odontoid (0) or fused (1).
  109. Atlas neurapophyses free (0) or fused to intercentrum/odontoid (1).
  110. Axial neural spine low (0) or tall and hatchetshaped (1) or elongate and posteriorly inclined (2).
  111. The neural spine of the axis anteroposteriorly short (0) or long, extending caudally to the posterior end of the centrum of the succeeding cervical (1).
  112. Syncervical absent (0), partially fused (centra but not arches) (1), or completely coossified (2).
  113. Dorsal vertebrae with flat articulations on zygapophyses (0) or tongue and grooves articulations on zygapophyses (1).
  114. Number of sacrals: five (0) or six (1) or seven (2) or eight or more (3).
  115. Outline of sacrum defines rectangle or hourglass in dorsal view (0) or oval in dorsal view (1).
  116. Caudal neural spines short and inclined (0) or tall and straight (1).
  117. Tail terminates with series of cylindrical caudals that are devoid of neural spines and chevrons (0) or neural spines and chevrons persist virtually to the end of tail (1).
  118. Distal chevrons with lobate expanded shape (0) or rodlike (1).
  119. Clavicles absent (0) or present (1).
  120. Scapula distinctly curved in sagittal view (0) or relatively flat (1).
  121. Scapular blade at acute angle relative to glenoid (0) or almost perpendicular to glenoid (1).
  122. Coracoid with smooth, arcuate anterior portion (0) or bearing large anterolateral ridge near

- confluence of anterior and ventral margins (1).
123. Olecranon process relatively small (0) or enlarged ( $\geq 1/3$  of ulnar length) (1).
  124. More than two distal carpals (0) or less than two distal carpals (1).
  125. Manus much smaller than pes (0) or closer to pes in size (1).
  126. Shaft of postpubis round (0) or mediolaterally flattened, blade-like (1) in cross section.
  127. Postpubis long and ventrally oriented (0) or short and posteriorly directed (1).
  128. Prepubis short and rod-shaped (0) or long and flared at anterior end (1).
  129. Ischial shaft straight (0) or with posterodorsally convex curvature (1).
  130. Femoral fourth trochanter large and pendant (0) or reduced (1).
  131. Tibio-femoral ratio more than one (0) or less than one (1).
  132. Foot gracile with long, constricted metatarsus, elongate phalanges (0) or short and uncompressed, all phalanges wider than long (1).
  133. Pedal unguals pointed (0) or rounded, hoof-like (1).
  134. Postorbital lateral surface smooth (0) or strongly sculptured (1).
  135. Angular lateral surface smooth (0) or strongly sculptured (1).
  136. Rostral end of quadratojugal contacting jugal undivided (0) or bifid around caudal end of jugal (1).
  137. Nasals flat or convex on midline (0) or with distinct nasal midline depression (1).
  138. Parietal roof flat or gently convex (0) or with sharp midline crest (1).
  139. Surangular without a lateral process below glenoid (0) or surangular knob (1).
  140. Height of middle caudal neural spine less than or equal to 2 (0), 2.1 to 3 times (1), 3.1 to 4 times (2) or more than 4.1 times (3) the height of the associated centrum.
  141. Ridge along the caudoventral edge of squamosal absent (0) or present (1).
  142. Occipital surface of supraoccipital flat, convex, or with midline ridge (0) or with midline depression along base of midline ridge (1).
  143. Accessory antorbital fenestra between naris and antorbital fenestra absent (0) or present (1).
  144. Radius without lateral and medial tuberosities along distal half of shaft (0) or tuberosities present (1).
  145. Coronoid process notch along caudal edge of dentary coronoid process absent (0) or present (1).
  146. Coronoid process notch wide (0) or constricted notch (1).
  147. Cervical centra with ventral keels (0) or some or all postaxial centra without keels (1).
  148. Width of proximal end of ungual relative to width of distal end of the preceding phalanx equal (0) or wider (1).
  149. Height of the caudal neural spine equal to or less than the length of the corresponding chevron (0) or greater (1).
  150. Anteroventral chin absent (0), poorly developed (1) or well-developed (2).
  151. Base (lower half) of the coronoid process vertical (0) or steeply inclined ( $>40\%$ ).
  152. Circumnarial depression, if deep, simple (0) or complex (1).
  153. Narial spine absent (0) or present (1).



002211011011??????02011??1100??????0????000101??01??1100-0  
Zuniceratops ???????1????????10??0????1???1?????????????????  
1??????1????????????211?1??0??0????????????-01120101?  
01??????????0????????????1?????0?00?0?01?0-??0000  
Psittaco\_sinen 1101110011101122000??00000110-00000000000?00????1?  
010010????????0??00001101000??01?000000??03-00?0?000?000??0010?  
1000????10??????0?0000101100?000-?0000-0  
Xuanhuaceratops ???????????  
0????????????????????????????????????????????????????????  
11010?1?????0?000?1111?0000000000000000????0??????110??????0?0?  
110??????????-0?0???  
Yamaceratops 11??1110????1??????  
0101000101001010011011100000111010???111010?100111?11101010?  
001111110?101[0 1]0000100010011??????0??1????????????????00000?  
10?00??0-0??00-0  
Prenoceratops ??0?1???1?00101?000??0100?1110011??011?11??????????  
0????11210??????11?12100010??011011???1013-0022110110?  
1????????????????????????????????0?00?0000001000110-0  
Cerasinops 1????????????????????0????10??01??011?11?????????  
110100111100?1010?????1?0?????0[1 2]1111??1?11?00210?0?1????0?  
1101[1 2]?1?1?1100?????1000000??10?00??0-00?01-0  
Yinlong 01001100?0?0?001000??00001000-01000000000000?00?1?00--  
1100200??00?101001000000?00000000101?1000000000000?0000??0?00?  
0?????00100?0??0110111?000?0-??00-0  
Koreaceratops ?????????????????????????????????????????????????  
????????????????????????????????????????????????????????  
101?????????0?00??????3??????01?????  
Zhuchengceratops 1????????????????????1???1????????????????  
1111111????????????????10??1100001011100001?101??  
02211011011????010????????????????????0??0?0??0101??00??  
Liaoceratops ?100111111010110000101100100-  
01010011001100000111010110011010?10011?0011001100001?  
01010010100000100?10001????????????????0????????????000110?000?  
0-??00-0  
Aquilops ?1001111?1?1101?000??01000110-0101????????????????  
0????????????????11?1110??10????????????????00000101010?  
01????????????????????????0??0??000??????0?-?  
Archaeoceratops 110011111011011000??01000111001?110??01110?00?  
11?010??11101?010011101?101010??01?11100?10100000101?000?1000??  
0100?0??????????00??000001100000?0-00000-0  
Auroraceratops ?1001???11011011000??010?01110010?00?101110?00?11?  
0101??11101?0100?1102?1010100001?11110010100?00101?100?  
1????????????????????????????000?10?000?0-??00-0  
Unescoceratops ?????????????????????????????????????????????  
????????????????2100000??11????????????00?2?10110?  
1????????????????????????????????????????21??  
Gryphoceratops ?????????????????????????????????????????????  
????????????????????000????????????????00????0??  
0????????????????????????????????????????????????1??



Ajkaceratops ?????1111????01?0???  
1????????????????????????????????????????????????????????????1?  
0????????????????????????????????????????????????????????????????  
?????????1?????????-0

Diabloceratops 1110111111011001121??  
0001121111102110111121111100221111?  
1101110112????????????????????????013-111201?1???  
1????????????????????????????0?000??001??-?????01

Helioceratops ?????????????????????????????????????????????????????  
????????????????????1101010???1????????????????00101?000?  
1????????????????????????????????????????????0-???00-?

Turanoceratops ?????????????????????0?????????1????????????????  
1?????????????????1??2????????????????????????1121111??  
11????????????????????????????????????????????????????????

Chasmosaurus

11101111110010011211100011211110211011112111110022111121101110  
112110211110?0101210110001013-11120111011?  
1112120310111010111111111100000000010-1100010

;

proc /;  
comments 0  
;





Ajkaceratops ?????1111????01?0???  
1????????????????????????????????????????????????????????????1?  
0????????????????????????????????????????????????????????????????????  
?????????1?????????-0

Diabloceratops 1110111111011001121??  
0001121111102110111121111100221111?  
1101110112????????????????????????013-111201?1???  
1????????????????????????????0?000??001??-?????01

Helioceratops ?????????????????????????????????????????????????????  
????????????????????1101010???1????????????????00101?000?  
1????????????????????????????????????????????0-???00-?

Turanoceratops ?????????????????????0?????????1????????????????  
1?????????????????1??2????????????????????????1121111??  
11????????????????????????????????????????????????????????

Chasmosaurus

11101111110010011211100011211110211011112111110022111121101110  
112110211110?0101210110001013-11120111011?  
1112120310111010111111111100000000010-1100010

;

proc /;  
comments 0  
;

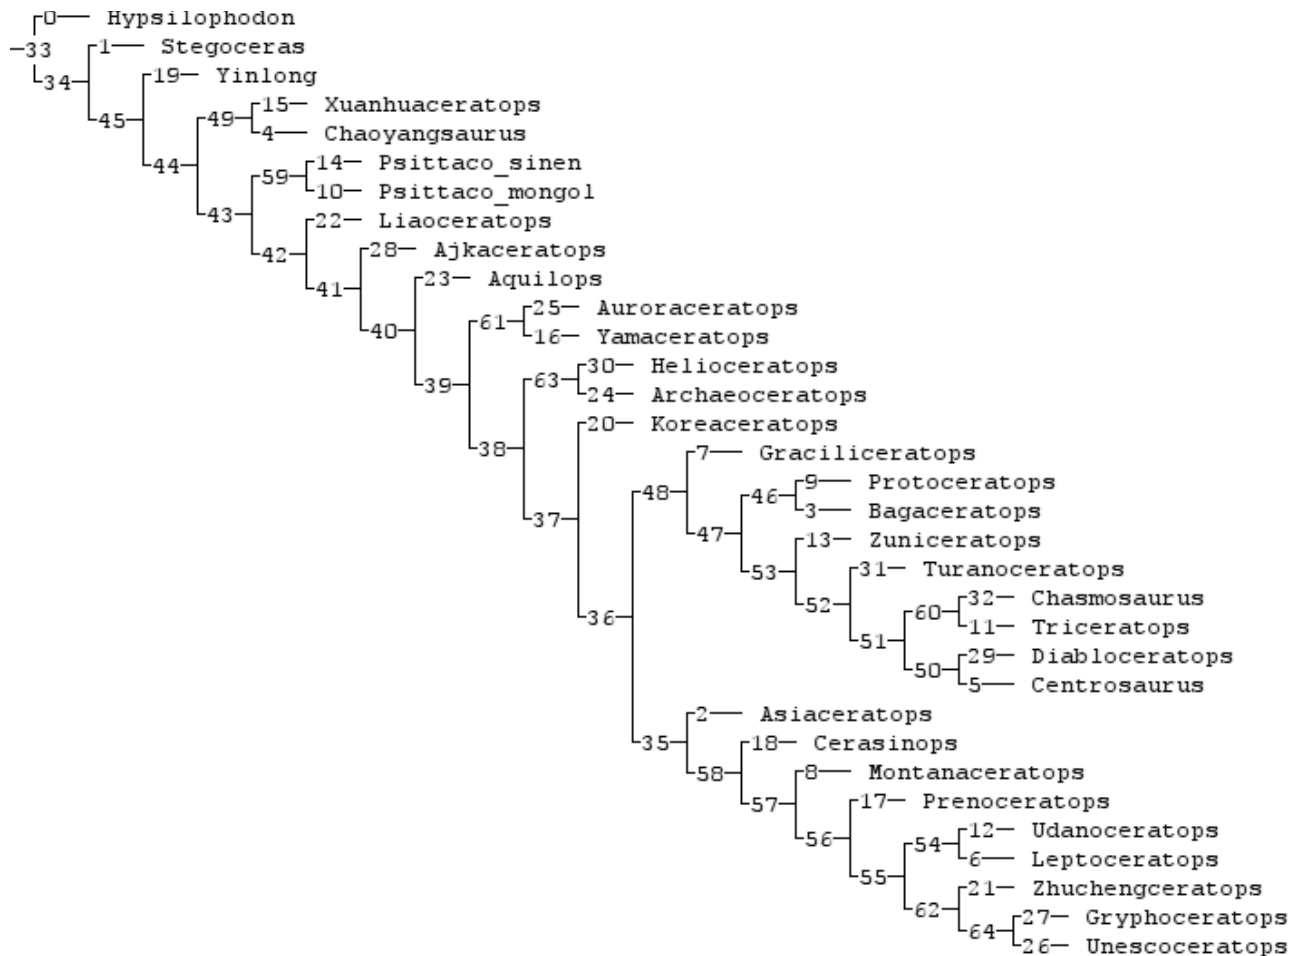

**Figure S1.** Most parsimonious tree, recovering *Ajkaceratops* as a basal neoceratopsian, with synapomorphy list.

- |                                                                                                                                         |                                                                                            |
|-----------------------------------------------------------------------------------------------------------------------------------------|--------------------------------------------------------------------------------------------|
| <b>Node 34:</b> No synapomorphies                                                                                                       | 148(1)                                                                                     |
| <b>Node 35 (Leptoceratopsidae):</b> 61(0)                                                                                               | <b>Node 49:</b> 78(1), 91(1), 93(1)                                                        |
| <b>Node 36:</b> 118(1)                                                                                                                  | <b>Node 50:</b> 153(1)                                                                     |
| <b>Node 37:</b> 117(1), 149(1)                                                                                                          | <b>Node 51 (Ceratopsidae):</b> 51(2)                                                       |
| <b>Node 38:</b> 113(1)                                                                                                                  | <b>Node 52:</b> 95(1), 101(1)                                                              |
| <b>Node 39:</b> 29(1), 105(1)                                                                                                           | <b>Node 53 (Ceratopsoidea):</b> 17(1), 31(1), 71(2), 96(1), 97(1), 116(0), 129(1)          |
| <b>Node 40:</b> 71(1)                                                                                                                   | <b>Node 54:</b> No synapomorphies                                                          |
| <b>Node 41:</b> No synapomorphies                                                                                                       | <b>Node 55:</b> 22(1)                                                                      |
| <b>Node 42 (Neoceratopsia):</b> 7(1), 8(1), 23(1), 34(1), 37(1), 38(1), 41(1), 42(1), 59(1), 61(1), 77(1), 85(1), 98(1), 102(1), 106(1) | <b>Node 56:</b> 84(0)                                                                      |
| <b>Node 43:</b> 13(1), 27(1), 82(1), 111(1), 134(0), 135(0)                                                                             | <b>Node 57:</b> 59(2), 99(1), 145(1)                                                       |
| <b>Node 44:</b> 1(1), 15(1), 28(1), 58(1), 73(1)                                                                                        | <b>Node 58:</b> 60(1), 97(2), 103(1)                                                       |
| <b>Node 45 (Ceratopsia):</b> 2(1), 5(1), 55(1), 67(1), 72(1), 90(1), 92(1), 138(1)                                                      | <b>Node 59 (Psittacosaurus):</b> 14(1), 15(2), 69(0), 92(0), 93(3), 122(1), 136(1), 139(1) |
| <b>Node 46 (Protoceratopsidae):</b> 18(1), 40(2), 70(1), 80(1), 89(1)                                                                   | <b>Node 60:</b> 12(0), 152(1)                                                              |
| <b>Node 47:</b> 133(1)                                                                                                                  | <b>Node 61:</b> No synapomorphies                                                          |
| <b>Node 48 (Coronosauria):</b> 36(1), 37(0), 39(1),                                                                                     | <b>Node 62:</b> 77(0), 81(1)                                                               |
|                                                                                                                                         | <b>Node 63:</b> 102(0)                                                                     |
|                                                                                                                                         | <b>Node 64:</b> 151(1)                                                                     |

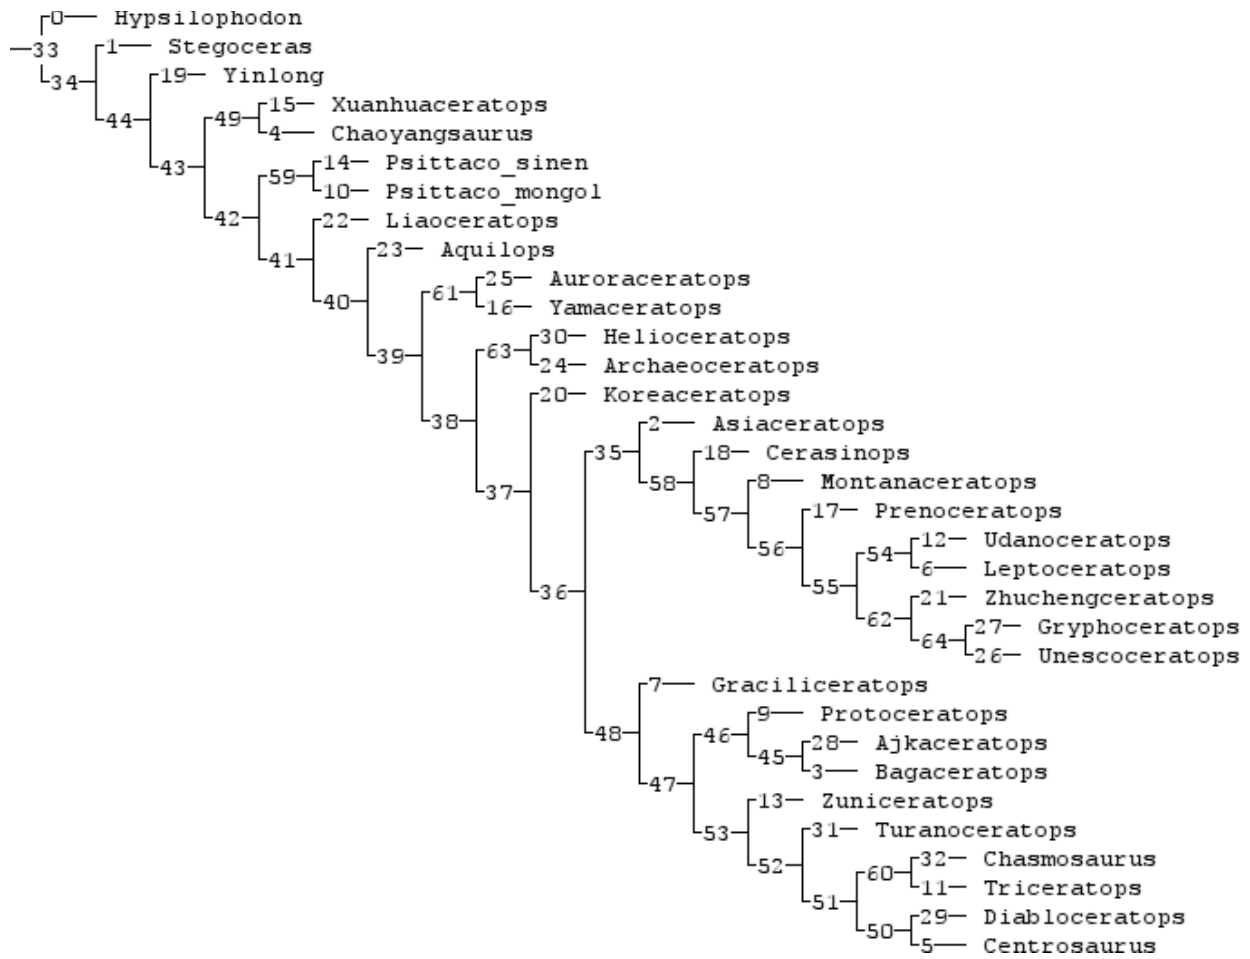

**Figure S2.** Most parsimonious tree, recovering *Ajkaceratops* as sister to *Bagaceratops*, with synapomorphy list.

- |                                                                                                                                         |                                                                                            |
|-----------------------------------------------------------------------------------------------------------------------------------------|--------------------------------------------------------------------------------------------|
| <b>Node 34:</b> No synapomorphies                                                                                                       | 148(1)                                                                                     |
| <b>Node 35 (Leptoceratopsidae):</b> 61(0)                                                                                               | <b>Node 49:</b> 78(1), 91(1), 93(1)                                                        |
| <b>Node 36:</b> 118(1)                                                                                                                  | <b>Node 50:</b> 153(1)                                                                     |
| <b>Node 37:</b> 117(1), 149(1)                                                                                                          | <b>Node 51 (Ceratopsidae):</b> 51(2)                                                       |
| <b>Node 38:</b> 113(1)                                                                                                                  | <b>Node 52:</b> 95(1), 101(1)                                                              |
| <b>Node 39:</b> 29(1), 105(1)                                                                                                           | <b>Node 53 (Ceratopsoidae):</b> 17(1), 31(1), 71(2), 96(1), 97(1), 116(0), 129(1)          |
| <b>Node 40:</b> 12(1), 71(1), 100(1)                                                                                                    | <b>Node 54:</b> No synapomorphies                                                          |
| <b>Node 41 (Neoceratopsia):</b> 7(1), 8(1), 23(1), 34(1), 37(1), 38(1), 41(1), 42(1), 59(1), 61(1), 77(1), 85(1), 98(1), 102(1), 106(1) | <b>Node 55:</b> 22(1)                                                                      |
| <b>Node 42:</b> 13(1), 27(1), 82(1), 111(1), 134(0), 135(0)                                                                             | <b>Node 56:</b> 84(0)                                                                      |
| <b>Node 43:</b> 1(1), 15(1), 28(1), 58(1), 73(1)                                                                                        | <b>Node 57:</b> 59(2), 99(1), 145(1)                                                       |
| <b>Node 44 (Ceratopsia):</b> 2(1), 5(1), 55(1), 67(1), 72(1), 90(1), 92(1), 138(1)                                                      | <b>Node 58:</b> 60(1), 97(2), 103(1)                                                       |
| <b>Node 45:</b> 143(1)                                                                                                                  | <b>Node 59 (Psittacosaurus):</b> 14(1), 15(2), 69(0), 92(0), 93(3), 122(1), 136(1), 139(1) |
| <b>Node 46 (Protoceratopsidae):</b> 18(1), 40(2), 70(1), 80(1), 89(1)                                                                   | <b>Node 60:</b> 12(0), 152(1)                                                              |
| <b>Node 47:</b> 133(1)                                                                                                                  | <b>Node 61:</b> No synapomorphies                                                          |
| <b>Node 48 (Coronosauria):</b> 36(1), 37(0), 39(1),                                                                                     | <b>Node 62:</b> 77(0), 81(1)                                                               |
|                                                                                                                                         | <b>Node 63:</b> 102(0)                                                                     |
|                                                                                                                                         | <b>Node 64:</b> 151(1)                                                                     |

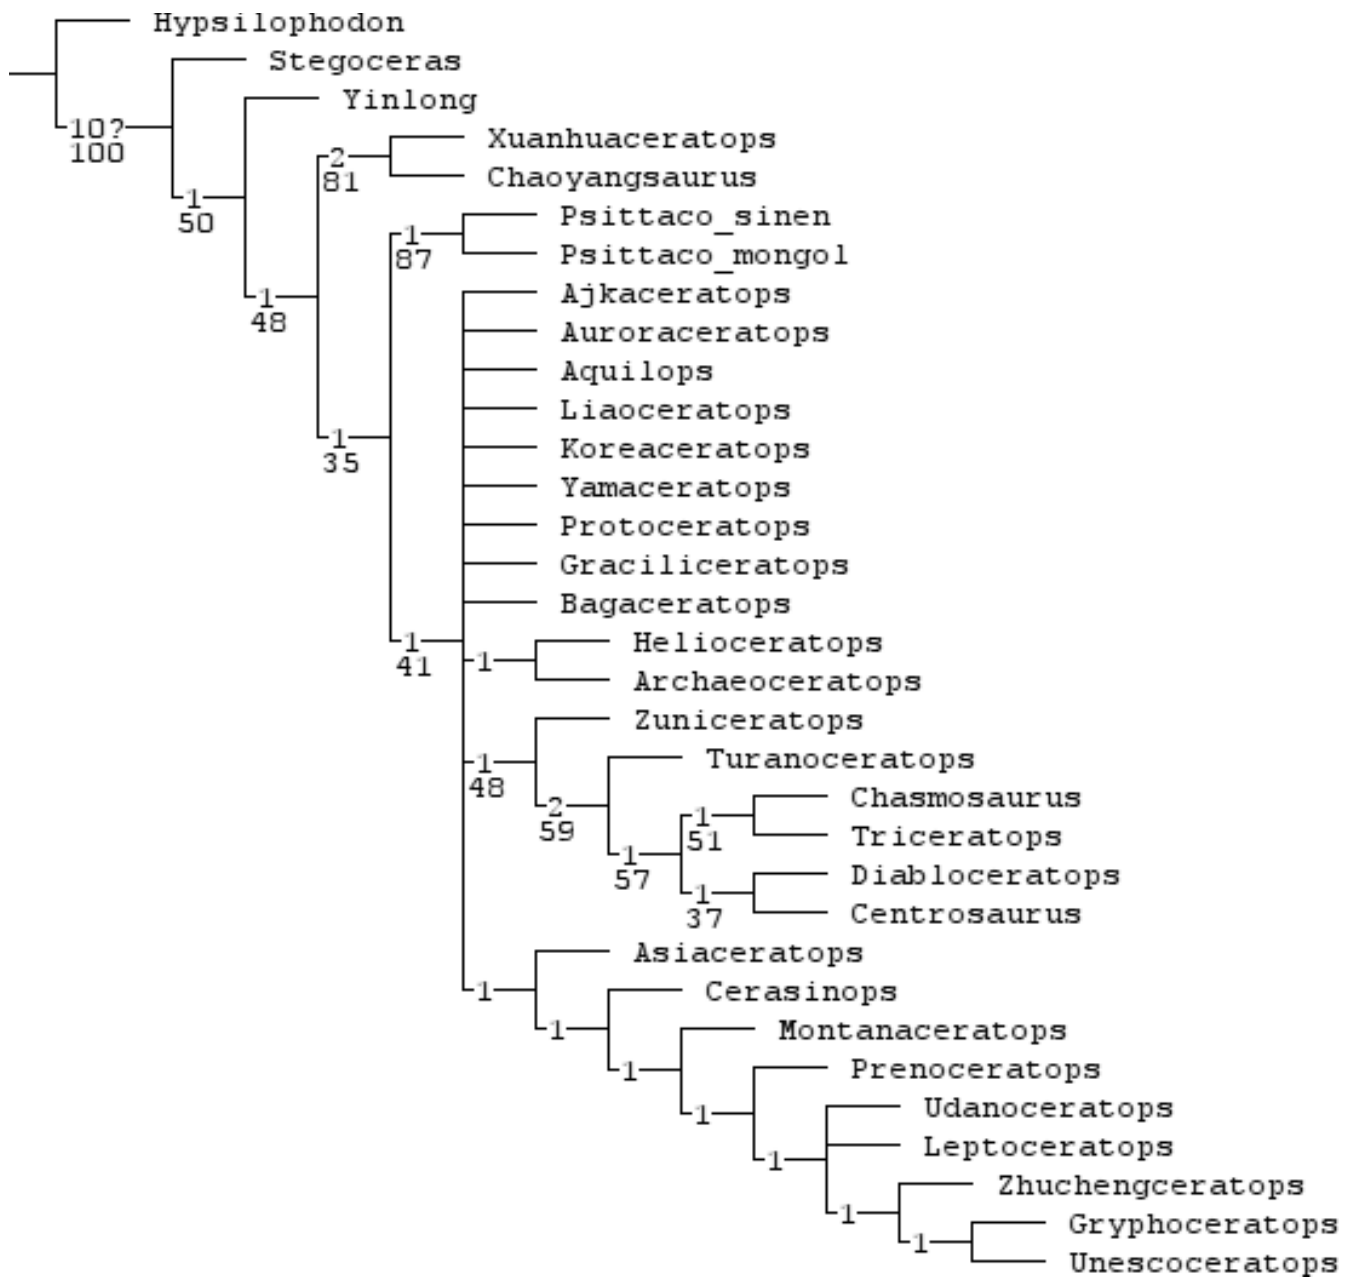

**Figure S3.** Branch support for the phylogenetic hypothesis recovered here, superimposed on the strict consensus of two equally most parsimonious trees. Bremer support values are indicated as the top value on each branch; bootstrap values (10,000 replicates, sampling with replacement) over 25% are indicated as the bottom value.

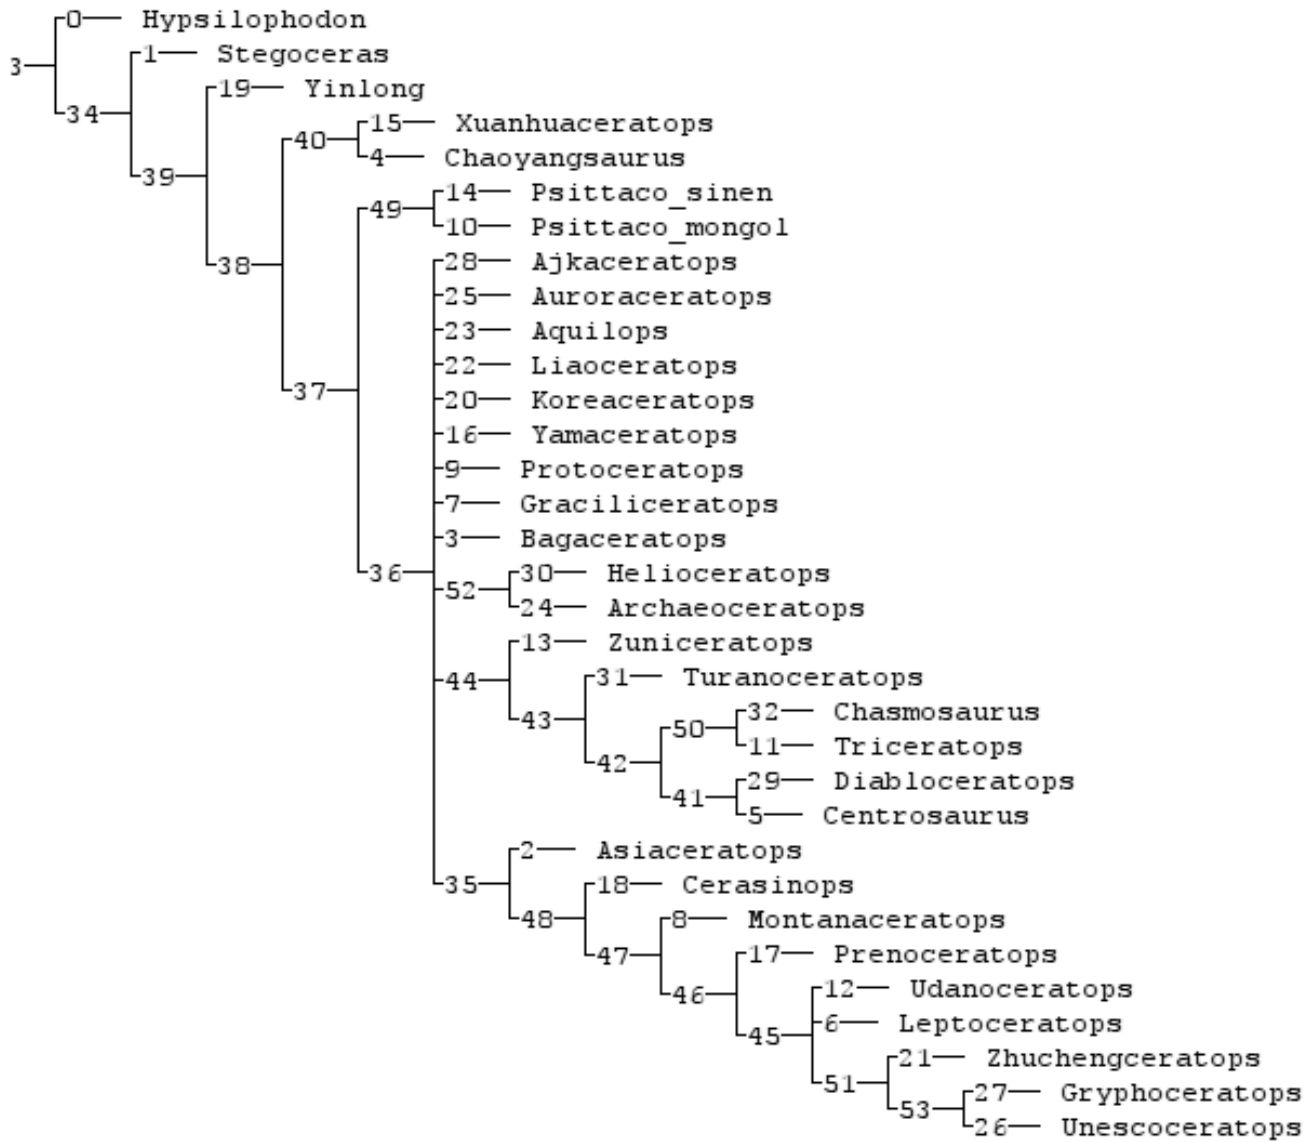

**Figure S4.** Strict consensus of 18 equally parsimonious trees, with selected ontogenetic-variant characters for *Aquilops americanus* scored as unknown, assuming that the holotype is a juvenile.



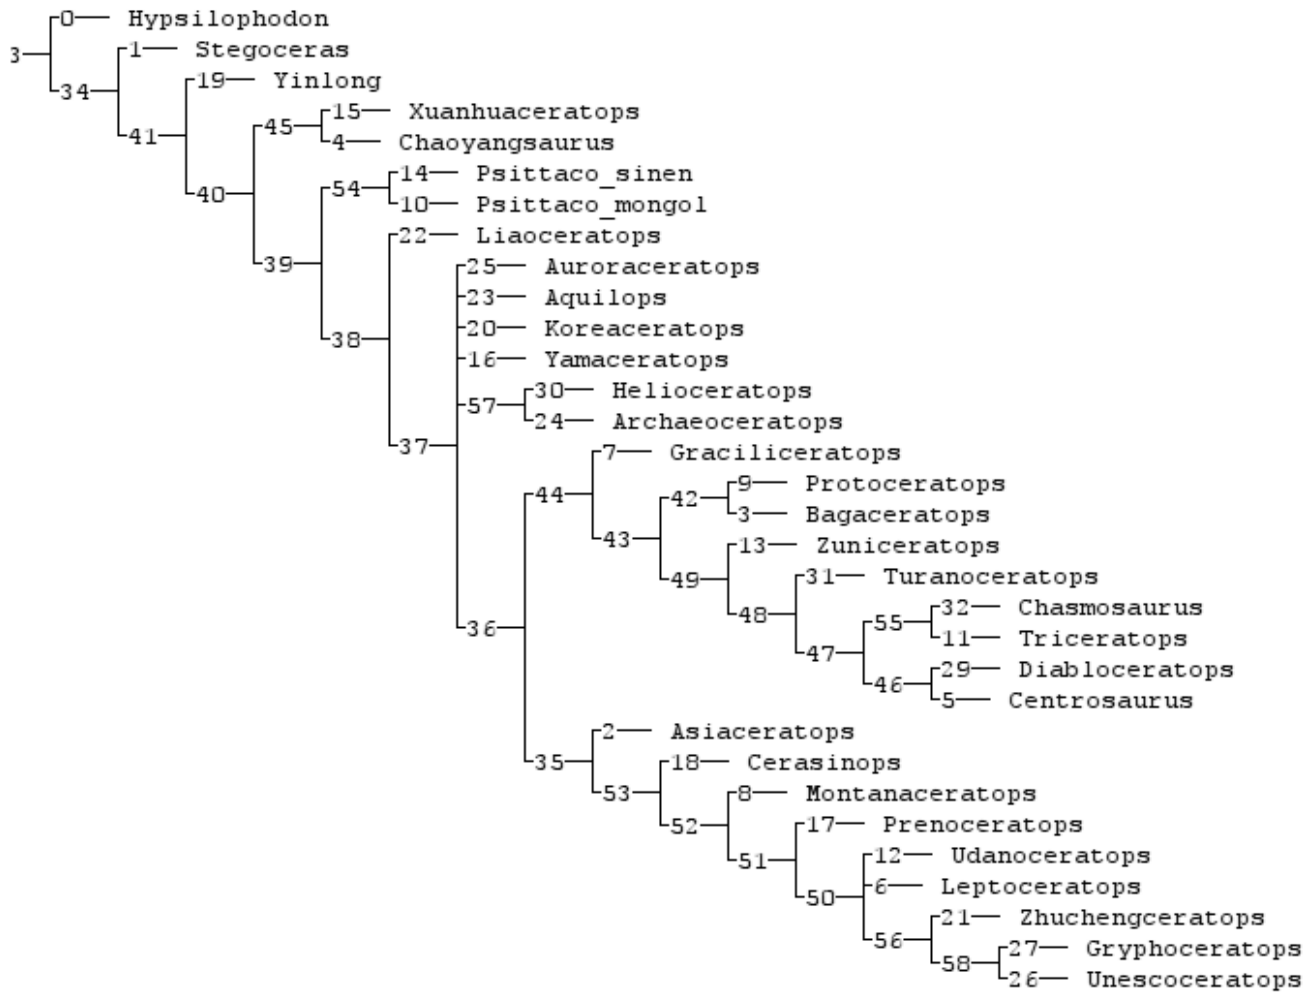

**Figure S5.** Strict consensus of 18 equally parsimonious trees, with selected ontogenetic-variant characters for *Aquilops americanus* scored as unknown, assuming that the holotype is a juvenile. In this version of the tree, the wildcard taxon *Ajkaceratops* has been pruned *post hoc*.

```

-----+ [NA] Centrosaurus
--N2+
: -----+ [NA] Diabloceratops
--N6+
: : -----+ [NA] Chasmosaurus
-N8+ --N5+
: : -----+ [NA] Triceratops
N10+ :
: : -----+ [A] Turanoceratops
: :
N16+ -----+ [NA] Zuniceratops
: :
: : -----+ [A] Bagaceratops
: : ---N13+
N18+ ---N15+ -----+ [E] Ajkaceratops
: : :
: : -----+ [A] Protoceratops
: :
: -----+ [A] Graciliceratops
:
:
: -----+ [A] Zhuchengceratops
:
: N23+
: : ---+ [NA] Unescoceratops
N36+ : N22+
: : N27+ ---+ [NA] Gryphoceratops
: : :
: : : -----+ [NA] Leptoceratops
: : N29+ -N26+
: : : -----+ [A] Udanoceratops
: : N31+ :
N38+ : : : -----+ [NA] Prenoceratops
: : : N33+ :
: : : : : -----+ [NA] Montanaceratops
: : : N35+ :
: : : : : -----+ [NA] Cerasinops
N42+ : : :
: : : : : -----+ [A] Asiaceratops
: : : : :
: : : -----+ [A] Koreaceratops
: :
N46+ : -----+ [A] Helioceratops
: : -----N41+
: : -----+ [A] Archaeoceratops
: :
N48+ : -----+ [A] Auroraceratops
: : -----N45+
: : -----+ [A] Yamaceratops
N50+ :
: : -----+ [NA] Aquilops
: :
N54+ -----+ [A] Liaoceratops
: :
: : -----+ [A] Psittaco_sinen
N58+ -----N53+
: : -----+ [A] Psittaco_mongol
: :
N60+ : -----+ [A] Xuanhuaceratops
: -----N57+
: -----+ [A] Chaoyangsaurus
:
-----+ [A] Yinlong

```

**Figure S6.** Phylogenetic tree recovering *Ajkaceratops* as sister to *Bagaceratops*, used for DEC modeling, with nodal numbers referenced in results (Table S1).

**Table S1.** Temporal calibrations and geographic areas used for DEC analysis. Abbreviations: A (Asia), E (Europe), NA (North America). All ages are given in Ma and calibrated relative to the 2012 Geological Time Scale (Gradstein et al., 2012).

| <b>Taxon</b>                       | <b>Area</b> | <b>Age</b>                      | <b>Lower Bound</b> | <b>Upper Bound</b> | <b>Midpoint</b> | <b>Date Assigned</b> | <b>Source</b>                                              |
|------------------------------------|-------------|---------------------------------|--------------------|--------------------|-----------------|----------------------|------------------------------------------------------------|
| <i>Ajkaceratops</i>                | E           | Santonian                       | 86.26              | 83.64              | 84.95           | 85.0                 | Ósi et al., 2010                                           |
| <i>Aquilops</i>                    | NA          | middle – late Albian            | 108.5              | 104                | 106.25          | 106.3                | this paper                                                 |
| <i>Archaeoceratops</i>             | A           | Albian                          | 112.95             | 100.5              | 106.725         | 106.7                | Tang et al., 2001                                          |
| <i>Asiaceratops</i>                | A           | early Cenomanian                | 100.5              | 96.24              | 98.37           | 98.4                 | Nessov 1995                                                |
| <i>Auroraceratops</i>              | A           | Albian                          | 112.95             | 100.5              | 106.725         | 106.7                | Tang et al., 2001                                          |
| <i>Bagaceratops</i>                | A           | Campanian                       | 83.64              | 72.05              | 77.845          | 77.9                 | Dingus et al. 2005                                         |
| <i>Centrosaurus</i>                | NA          | late Campanian                  | 76.4               | 70.6               | 73.5            | 75.8                 | Roberts et al. 2013                                        |
| <i>Cerasinops</i>                  | NA          | early Campanian                 | 80                 | 76.5               | 78.25           | 78.3                 | Chinnery and Horner 2007                                   |
| <i>Chaoyangsaurus</i>              | A           | Bathonian                       | 168.28             | 166.07             | 167.175         | 167.2                | Zhao et al. 1999                                           |
| <i>Chasmosaurus</i>                | NA          | late Campanian                  | 76.4               | 70.6               | 73.5            | 75.8                 | Roberts et al. 2013                                        |
| <i>Diabloceratops</i>              | NA          | middle Campanian                | 80.63              | 77.0               | 78.815          | 78.8                 | Roberts et al. 2013;<br>Jinnah 2013                        |
| <i>Graciliceratops</i>             | A           | Cenomanian – Santonian          | 100.5              | 83.64              | 92.07           | 92.1                 | Hicks et al. 1999                                          |
| <i>Gryphoceratops</i>              | NA          | late Santonian                  | 85.23              | 83.64              | 84.435          | 84.4                 | Ryan et al. 2012                                           |
| <i>Helioceratops</i>               | A           | Albian – early Turonian         | 112.95             | 92.9               | 102.925         | 102.9                | Wan et al. 2013; Wang et al. 2013                          |
| <i>Koreaceratops</i>               | A           | Albian (earlier than 103 Ma)    | 112.95             | 103                | 107.975         | 108.0                | Lee et al. 2011                                            |
| <i>Leptoceratops</i>               | NA          | late Maastrichtian              | 68                 | 66.04              | 67.02           | 68.0                 | Hicks et al. 2002                                          |
| <i>Liaoceratops</i>                | A           | late Barremian – early Aptian   | 129.7              | 122.9              | 126.3           | 126.3                | Sun et al. 2011;<br>Chang et al. 2009                      |
| <i>Montanaceratops</i>             | NA          | early Maastrichtian             | 69.4               | 69.2               | 69.3            | 69.8                 | Eberth et al. 2013<br>(recalibrated by subtracting 0.5 Ma) |
| <i>Prenoceratops</i>               | NA          | late Campanian                  | 75.0               | 75.0               | 75.0            | 75.0                 | Roberts et al. 2013                                        |
| <i>Protoceratops andrewsi</i>      | A           | late Campanian                  | 76.38              | 72.05              | 74.215          | 74.2                 | Dashzeveg et al. 2005                                      |
| <i>Psittacosaurus mongoliensis</i> | A           | Aptian / Albian                 | 126.3              | 100.5              | 113.4           | 113.4                | Sereno 2010                                                |
| <i>Psittacosaurus sinensis</i>     | A           | Barremian                       | 130.77             | 126.3              | 128.535         | 128.5                | Gao and Cheng 1999                                         |
| <i>Triceratops</i>                 | NA          | late Maastrichtian              | 68                 | 66.04              | 67.02           | 68.0                 | Hicks et al. 2002                                          |
| <i>Turanoceratops</i>              | A           | mid- to late Turonian           | 92.9               | 89.77              | 91.335          | 91.3                 | Sues and Averianov 2009                                    |
| <i>Udanoceratops</i>               | A           | late Campanian                  | 76.38              | 72.05              | 74.215          | 74.2                 | Dashzeveg et al. 2005                                      |
| <i>Unescoceratops</i>              | NA          | late Campanian                  | 75.8               | 75.8               | 75.8            | 75.8                 | Roberts et al. 2013                                        |
| <i>Xuanhuaceratops</i>             | A           | Late Jurassic                   | 152.57             | 145.01             | 148.79          | 148.8                | Zhao et al. 2006;<br>Sullivan et al. 2009                  |
| <i>Yamaceratops</i>                | A           | Santonian – Campanian           | 86.26              | 72.05              | 79.155          | 79.2                 | Eberth et al. 2009                                         |
| <i>Yinlong</i>                     | A           | Oxfordian                       | 163.47             | 157.25             | 160.36          | 160.4                | Xu et al. 2006                                             |
| <i>Zhuchengceratops</i>            | A           | ?late Campanian – Maastrichtian | 76.38              | 66.04              | 71.21           | 71.2                 | Loewen et al. 2013                                         |
| <i>Zuniceratops</i>                | NA          | mid- to late Turonian           | 92.9               | 89.77              | 91.335          | 91.3                 | Wolfe & Kirkland 1998                                      |

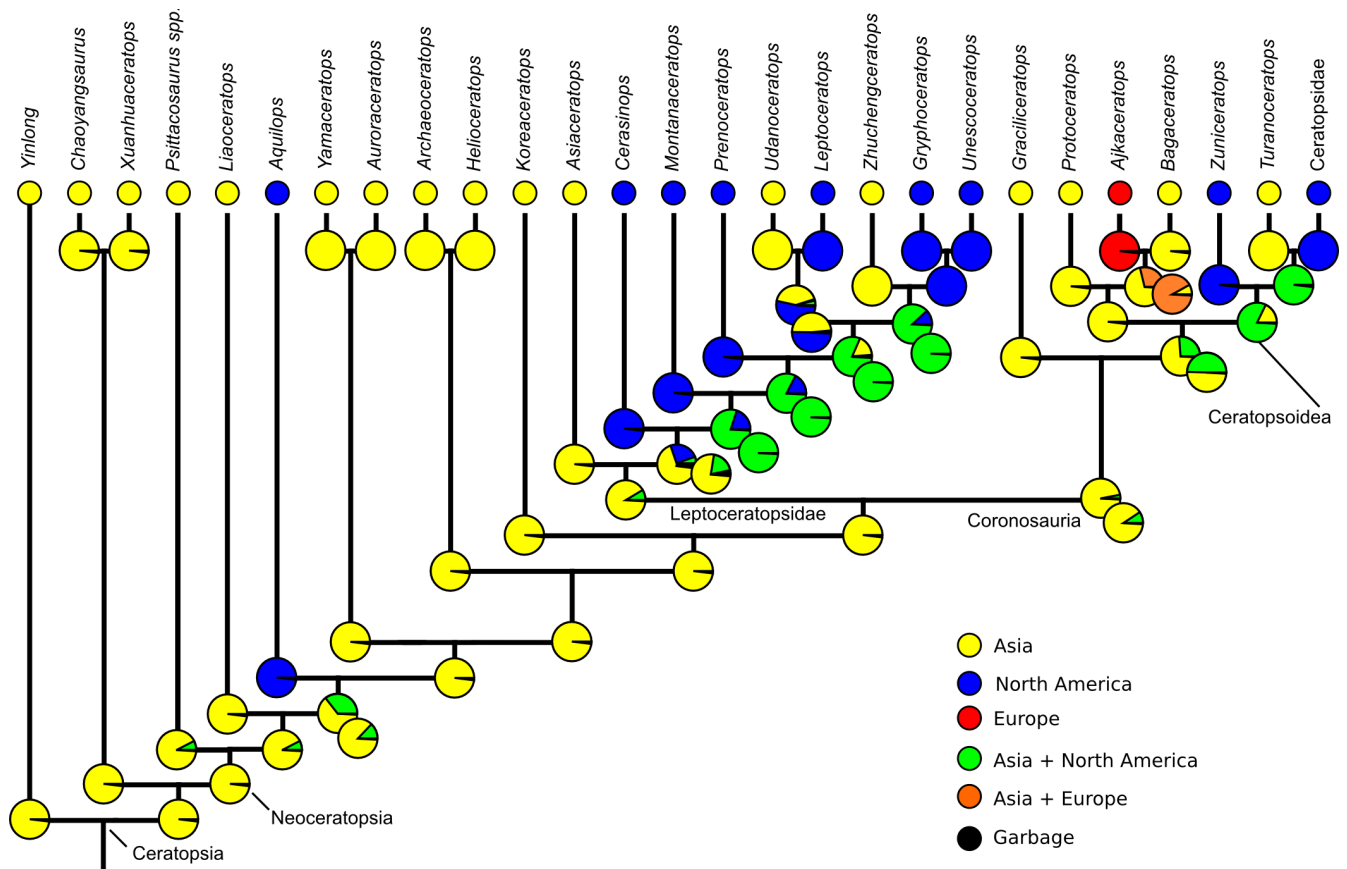

**Figure S7.** Hypothesis of phylogeny and biogeography of Ceratopsia, summarizing DEC modeling results. Some terminal taxa have been combined into supraspecific units; a full tree is provided in Figure S6. Localities and reconstructed ancestral ranges from DEC are plotted. The relative probabilities for the ancestral area for each branch are indicated by the colored circles. To simplify visualization, when the relative probabilities for both the “smoothed” and “strict” temporal calibrations were within 0.05 units of each other, they are represented by a single point. When they differ by more than 0.05 units, the one at top left depicts the “smoothed” results and the one at right depicts the “strict” results. Complete results, with a precise listing of the relative probabilities for each reconstruction, are contained in Table S2.

**Table S2.** Node-by-node results for DEC analysis. Node numbers are indicated in Figure S6; temporal calibrations (smoothed and strict) are explained in the main text. Branch letters indicate the taxa that branch off from each node.

| Node | Calibration | Branch A (Upper)          | A Area  | Branch B                      | B Area  | lnL    | Relative Probability |
|------|-------------|---------------------------|---------|-------------------------------|---------|--------|----------------------|
| 60   | smoothed    | <i>Centrosaurus</i>       | Asia    | <i>Yinlong</i>                | Asia    | -38.95 | 0.983                |
| 60   | strict      | <i>Centrosaurus</i>       | Asia    | <i>Yinlong</i>                | Asia    | -37.93 | 0.9855               |
| 58   | smoothed    | <i>Centrosaurus</i>       | Asia    | <i>Chaoyangsaurus</i>         | Asia    | -38.95 | 0.983                |
| 58   | strict      | <i>Centrosaurus</i>       | Asia    | <i>Chaoyangsaurus</i>         | Asia    | -37.93 | 0.9854               |
| 57   | smoothed    | <i>Xuanhuaceratops</i>    | Asia    | <i>Chaoyangsaurus</i>         | Asia    | -38.93 | 1                    |
| 57   | strict      | <i>Xuanhuaceratops</i>    | Asia    | <i>Chaoyangsaurus</i>         | Asia    | -37.92 | 1                    |
| 54   | smoothed    | <i>Centrosaurus</i>       | Asia    | <i>Psittaco. mongoliensis</i> | Asia    | -39.02 | 0.9141               |
| 54   | smoothed    | <i>Centrosaurus</i>       | Asia+NA | <i>Psittaco. mongoliensis</i> | Asia    | -41.51 | 0.07583              |
| 54   | strict      | <i>Centrosaurus</i>       | Asia    | <i>Psittaco. mongoliensis</i> | Asia    | -38.05 | 0.8755               |
| 54   | strict      | <i>Centrosaurus</i>       | Asia+NA | <i>Psittaco. mongoliensis</i> | Asia    | -40.02 | 0.1218               |
| 53   | smoothed    | <i>Psittaco. sinensis</i> | Asia    | <i>Psittaco. mongoliensis</i> | Asia    | -38.93 | 1                    |
| 53   | strict      | <i>Psittaco. sinensis</i> | Asia    | <i>Psittaco. mongoliensis</i> | Asia    | -37.92 | 1                    |
| 50   | smoothed    | <i>Centrosaurus</i>       | Asia    | <i>Liaoceratops</i>           | Asia    | -39.4  | 0.6295               |
| 50   | smoothed    | <i>Centrosaurus</i>       | Asia+NA | <i>Liaoceratops</i>           | Asia    | -40    | 0.3449               |
| 50   | strict      | <i>Centrosaurus</i>       | Asia    | <i>Liaoceratops</i>           | Asia    | -38.08 | 0.8506               |
| 50   | strict      | <i>Centrosaurus</i>       | Asia+NA | <i>Liaoceratops</i>           | Asia    | -39.96 | 0.1297               |
| 48   | smoothed    | <i>Centrosaurus</i>       | Asia    | <i>Aquilops</i>               | NA      | -38.95 | 0.9845               |
| 48   | strict      | <i>Centrosaurus</i>       | Asia    | <i>Aquilops</i>               | NA      | -37.93 | 0.9905               |
| 46   | smoothed    | <i>Centrosaurus</i>       | Asia    | <i>Yamaceratops</i>           | Asia    | -38.95 | 0.984                |
| 46   | strict      | <i>Centrosaurus</i>       | Asia    | <i>Yamaceratops</i>           | Asia    | -37.93 | 0.9905               |
| 45   | smoothed    | <i>Auroraceratops</i>     | Asia    | <i>Yamaceratops</i>           | Asia    | -38.93 | 1                    |
| 45   | strict      | <i>Auroraceratops</i>     | Asia    | <i>Yamaceratops</i>           | Asia    | -37.92 | 1                    |
| 42   | smoothed    | <i>Centrosaurus</i>       | Asia    | <i>Archaeoceratops</i>        | Asia    | -38.95 | 0.9826               |
| 42   | strict      | <i>Centrosaurus</i>       | Asia    | <i>Archaeoceratops</i>        | Asia    | -37.93 | 0.9904               |
| 41   | smoothed    | <i>Helioceratops</i>      | Asia    | <i>Archaeoceratops</i>        | Asia    | -38.93 | 1                    |
| 41   | strict      | <i>Helioceratops</i>      | Asia    | <i>Archaeoceratops</i>        | Asia    | -37.92 | 1                    |
| 38   | smoothed    | <i>Centrosaurus</i>       | Asia    | <i>Koreaceratops</i>          | Asia    | -38.96 | 0.9786               |
| 38   | strict      | <i>Centrosaurus</i>       | Asia    | <i>Koreaceratops</i>          | Asia    | -37.93 | 0.9901               |
| 36   | smoothed    | <i>Centrosaurus</i>       | Asia    | <i>Asiaceratops</i>           | Asia    | -39.08 | 0.8665               |
| 36   | smoothed    | <i>Centrosaurus</i>       | Asia    | <i>Asiaceratops</i>           | Asia+NA | -41.55 | 0.07306              |
| 36   | smoothed    | <i>Centrosaurus</i>       | Asia+NA | <i>Asiaceratops</i>           | Asia    | -42.32 | 0.03372              |
| 36   | strict      | <i>Centrosaurus</i>       | Asia    | <i>Asiaceratops</i>           | Asia    | -38.11 | 0.8253               |
| 36   | strict      | <i>Centrosaurus</i>       | Asia+NA | <i>Asiaceratops</i>           | Asia    | -40.11 | 0.112                |
| 36   | strict      | <i>Centrosaurus</i>       | Asia    | <i>Asiaceratops</i>           | Asia+NA | -41.2  | 0.03766              |
| 35   | smoothed    | <i>Zhuchengceratops</i>   | Asia    | <i>Asiaceratops</i>           | Asia    | -39.21 | 0.7572               |
| 35   | smoothed    | <i>Zhuchengceratops</i>   | NA      | <i>Asiaceratops</i>           | Asia    | -40.63 | 0.1841               |
| 35   | smoothed    | <i>Zhuchengceratops</i>   | Asia+NA | <i>Asiaceratops</i>           | Asia    | -41.77 | 0.05875              |
| 35   | strict      | <i>Zhuchengceratops</i>   | Asia    | <i>Asiaceratops</i>           | Asia    | -37.97 | 0.9435               |
| 35   | strict      | <i>Zhuchengceratops</i>   | Asia+NA | <i>Asiaceratops</i>           | Asia    | -41.37 | 0.03167              |
| 33   | smoothed    | <i>Zhuchengceratops</i>   | Asia+NA | <i>Cerasinops</i>             | NA      | -39.16 | 0.7992               |
| 33   | smoothed    | <i>Zhuchengceratops</i>   | NA      | <i>Cerasinops</i>             | NA      | -40.65 | 0.1802               |
| 33   | strict      | <i>Zhuchengceratops</i>   | Asia+NA | <i>Cerasinops</i>             | NA      | -37.94 | 0.978                |
| 31   | smoothed    | <i>Zhuchengceratops</i>   | Asia+NA | <i>Montanaceratops</i>        | NA      | -39.14 | 0.8169               |
| 31   | smoothed    | <i>Zhuchengceratops</i>   | NA      | <i>Montanaceratops</i>        | NA      | -40.69 | 0.1725               |
| 31   | strict      | <i>Zhuchengceratops</i>   | Asia+NA | <i>Montanaceratops</i>        | NA      | -37.94 | 0.9782               |
| 29   | smoothed    | <i>Zhuchengceratops</i>   | Asia+NA | <i>Prenoceratops</i>          | NA      | -39.11 | 0.8363               |

|             |                                 |                              |        |        |
|-------------|---------------------------------|------------------------------|--------|--------|
| 29 smoothed | <i>Zhuchengceratops</i> NA      | <i>Prenoceratops</i> NA      | -40.83 | 0.1506 |
| 29 strict   | <i>Zhuchengceratops</i> Asia+NA | <i>Prenoceratops</i> NA      | -37.94 | 0.9762 |
| 27 smoothed | <i>Zhuchengceratops</i> Asia+NA | <i>Udanoceratops</i> Asia    | -39.8  | 0.4192 |
| 27 smoothed | <i>Zhuchengceratops</i> Asia+NA | <i>Udanoceratops</i> NA      | -39.8  | 0.4192 |
| 27 smoothed | <i>Zhuchengceratops</i> NA      | <i>Udanoceratops</i> NA      | -41.37 | 0.0872 |
| 27 smoothed | <i>Zhuchengceratops</i> NA      | <i>Udanoceratops</i> Asia+NA | -42.38 | 0.032  |
| 27 strict   | <i>Zhuchengceratops</i> Asia+NA | <i>Udanoceratops</i> Asia    | -38.64 | 0.4854 |
| 27 strict   | <i>Zhuchengceratops</i> Asia+NA | <i>Udanoceratops</i> NA      | -38.64 | 0.4854 |
| 26 smoothed | <i>Leptoceratops</i> NA         | <i>Udanoceratops</i> Asia    | -38.93 | 1      |
| 26 strict   | <i>Leptoceratops</i> NA         | <i>Udanoceratops</i> Asia    | -37.92 | 1      |
| 23 smoothed | <i>Zhuchengceratops</i> Asia    | <i>Gryphoceratops</i> NA     | -38.93 | 1      |
| 23 strict   | <i>Zhuchengceratops</i> Asia    | <i>Gryphoceratops</i> NA     | -37.92 | 1      |
| 22 smoothed | <i>Unescoceratops</i> NA        | <i>Gryphoceratops</i> NA     | -38.93 | 1      |
| 22 strict   | <i>Unescoceratops</i> NA        | <i>Gryphoceratops</i> NA     | -37.92 | 1      |
| 18 smoothed | <i>Centrosaurus</i> Asia        | <i>Graciliceratops</i> Asia  | -39.27 | 0.7147 |
| 18 smoothed | <i>Centrosaurus</i> Asia+NA     | <i>Graciliceratops</i> Asia  | -40.23 | 0.2739 |
| 18 strict   | <i>Centrosaurus</i> Asia+NA     | <i>Graciliceratops</i> Asia  | -38.6  | 0.5033 |
| 18 strict   | <i>Centrosaurus</i> Asia        | <i>Graciliceratops</i> Asia  | -38.64 | 0.4844 |
| 16 smoothed | <i>Centrosaurus</i> Asia+NA     | <i>Protoceratops</i> Asia    | -39.15 | 0.8082 |
| 16 smoothed | <i>Centrosaurus</i> Asia        | <i>Protoceratops</i> Asia    | -40.68 | 0.1738 |
| 16 strict   | <i>Centrosaurus</i> Asia+NA     | <i>Protoceratops</i> Asia    | -38.15 | 0.7921 |
| 16 strict   | <i>Centrosaurus</i> Asia        | <i>Protoceratops</i> Asia    | -39.58 | 0.19   |
| 15 smoothed | <i>Bagaceratops</i> Asia        | <i>Protoceratops</i> Asia    | -39.28 | 0.7073 |
| 15 smoothed | <i>Bagaceratops</i> Asia+Europe | <i>Protoceratops</i> Asia    | -40.18 | 0.2893 |
| 15 strict   | <i>Bagaceratops</i> Asia+Europe | <i>Protoceratops</i> Asia    | -38    | 0.9194 |
| 15 strict   | <i>Bagaceratops</i> Asia        | <i>Protoceratops</i> Asia    | -40.45 | 0.0797 |
| 13 smoothed | <i>Bagaceratops</i> Asia        | <i>Ajkaceratops</i> Europe   | -38.93 | 1      |
| 13 strict   | <i>Bagaceratops</i> Asia        | <i>Ajkaceratops</i> Europe   | -37.92 | 1      |
| 10 smoothed | <i>Centrosaurus</i> Asia+NA     | <i>Zuniceratops</i> NA       | -38.94 | 0.9956 |
| 10 strict   | <i>Centrosaurus</i> Asia+NA     | <i>Zuniceratops</i> NA       | -37.92 | 0.9943 |
| 8 smoothed  | <i>Centrosaurus</i> NA          | <i>Turanoceratops</i> Asia   | -38.93 | 1      |
| 8 strict    | <i>Centrosaurus</i> NA          | <i>Turanoceratops</i> Asia   | -37.92 | 1      |
| 6 smoothed  | <i>Centrosaurus</i> NA          | <i>Triceratops</i> NA        | -38.93 | 1      |
| 6 strict    | <i>Centrosaurus</i> NA          | <i>Triceratops</i> NA        | -37.92 | 1      |
| 5 smoothed  | <i>Chasmosaurus</i> NA          | <i>Triceratops</i> NA        | -38.93 | 1      |
| 5 strict    | <i>Chasmosaurus</i> NA          | <i>Triceratops</i> NA        | -37.92 | 1      |
| 2 smoothed  | <i>Centrosaurus</i> NA          | <i>Diabloceratops</i> NA     | -38.93 | 1      |
| 2 strict    | <i>Centrosaurus</i> NA          | <i>Diabloceratops</i> NA     | -37.92 | 1      |

## Literature Cited

- Chang, S., H. Zhang, P. R. Renne, and Y. Fang. 2009. High-precision  $^{40}\text{Ar}/^{39}\text{Ar}$  age for the Jehol Biota. *Palaeogeography, Palaeoclimatology, Palaeoecology* 280:94–104.
- Chinnery, B. J., and J. R. Horner. 2007. A new neoceratopsian dinosaur linking North American and Asian taxa. *Journal of Vertebrate Paleontology* 27:625–641.
- Dashzeveg, D., L. Dingus, D. B. Loope, C. C. Swisher, T. Dulam, and M. R. Sweeney. 2005. New stratigraphic subdivision, depositional environment, and age estimate for the Upper Cretaceous Djadokhta Formation, Southern Ulan Nur Basin, Mongolia. *American Museum Novitates* 3498:1–31.
- Dingus, L., D. B. Loope, D. Dashzeveg, C. C. Swisher, C. Minjin, M. J. Novacek, and M. Norell. 2008. The geology of Ukhaa Tolgod (Djadokhta Formation, Upper Cretaceous, Nemegt Basin, Mongolia). *American Museum Novitates* 3616:1–40.
- Eberth, D. A., Y. Kobayashi, Y.-N. Lee, O. Mateus, F. Therrien, D. K. Zelenitsky, and M. A. Norell. 2009. Assignment of *Yamaceratops dorngobiensis* and associated redbeds at Shine Us Khudag (eastern Gobi, Dorngobi Province, Mongolia) to the redescribed Javkhant Formation (Upper Cretaceous). *Journal of Vertebrate Paleontology* 29:295–302.
- Eberth, D. A., D. C. Evans, D. B. Brinkman, F. Therrien, D. H. Tanke, and L. S. Russell. 2013. Dinosaur biostratigraphy of the Edmonton Group (Upper Cretaceous), Alberta, Canada: evidence for climate influence. *Canadian Journal of Earth Sciences* 50:701–726.
- Gao, K., and Z. Cheng. 1999. A new lizard from the Lower Cretaceous of Shandong, China. *Journal of Vertebrate Paleontology* 19:456–465.
- Gradstein, F. M., J. G. Ogg, M. Schmitz, and G. Ogg (eds.). 2012. *The Geologic Time Scale 2012*. Elsevier, 1176 pp.
- Hicks, J. F., D. L. Brinkman, D. J. Nichols, and M. Watabe. 1999. Paleomagnetic and palynologic analyses of Albian to Santonian strata at Bayn Shireh, Burkhan, and Khuren Dukh, eastern Gobi Desert, Mongolia. *Cretaceous Research* 20:829–850.
- Hicks, J. F., K. R. Johnson, J. D. Obradovich, L. Tauxe, and D. Clark. 2002. Magnetostratigraphy and geochronology of the Hell Creek and basal Fort Union Formations of southwestern North Dakota and a recalibration of the age of the Cretaceous-Tertiary boundary. *Geological Society of America Special Papers* 361:35–55.
- Lee, Y.-N., M. Ryan, and Y. Kobayashi. 2011. The first ceratopsian dinosaur from South Korea. *Naturwissenschaften* 98:39–49.
- Loewen, M. A., R. B. Irmis, J. J. W. Sertich, P. J. Currie, and S. D. Sampson. 2013. Tyrant dinosaur evolution tracks the rise and fall of Late Cretaceous oceans. *PLoS ONE* 8:e79420.
- Makovicky, P., and M. A. Norell. 2006. *Yamaceratops dorngobiensis*, a new primitive ceratopsian (Dinosauria: Ornithischia) from the Cretaceous of Mongolia. *American Museum Novitates* 3530:1–42.
- Makovicky, P. J. 2010. A redescription of the *Montanoceratops cerorhynchus* holotype, with a review of referred material; pp. 68–82 in M. J. Ryan, B. J. Chinnery-Allgeier, and D. A. Eberth (eds.), *New Perspectives on Horned Dinosaurs: The Royal Tyrrell Museum Ceratopsian Symposium*. Indiana University Press, Bloomington, Indiana.
- Nessov, L. A. 1995. *Dinozavri Severnoi Yevrazii: Novye Dannye O Sostave Kompleksov, Ekologii I Paleobiogeografii* [Dinosaurs of Northern Eurasia: New Data about Assemblages, Ecology, and Paleobiogeography]. Institute for Scientific Research on the Earth's Crust, St. Petersburg State University, St. Petersburg, St. Petersburg, pp.
- Ősi, A., R. J. Butler, and D. B. Weishampel. 2010. A Late Cretaceous ceratopsian dinosaur from Europe with Asian affinities. *Nature* 465:466–468.
- Roberts, E. M., S. D. Sampson, A. Deino, S. Bowring, and R. Buchwaldt. 2013. The Kaiparowits

Formation: a remarkable record of Late Cretaceous terrestrial environments, ecosystems and evolution in Western North America; pp. 85–106 in A. L. Titus and M. A. Loewen (eds.), *At the Top of the Grand Staircase: The Late Cretaceous of Southern Utah*. Indiana University Press, Bloomington, Indiana.

- Ryan, M. J., D. C. Evans, P. J. Currie, C. M. Brown, and D. Brinkman. 2012. New leptoceratopsids from the Upper Cretaceous of Alberta, Canada. *Cretaceous Research* 35:69–80.
- Sereno, P. C. 2010. Taxonomy, cranial morphology, and relationships of parrot-beaked dinosaurs (Ceratopsia: *Psittacosaurus*); pp. 21–58 in M. Ryan, B. J. Chinnery-Allgeier, and D. A. Eberth (eds.), *New Perspectives on Horned Dinosaurs: The Royal Tyrrell Museum Ceratopsian Symposium*. Indiana University Press, Bloomington.
- Sues, H.-D., and A. Averianov. 2009. *Turanoceratops tardabilis*-the first ceratopsid dinosaur from Asia. *Die Naturwissenschaften* 96:645–652.
- Sullivan, C., D. W. E. Hone, T. D. Cope, Y. Liu, and J. Liu. 2009. A new occurrence of small theropod tracks in the Houcheng (Tuchengzi) Formation of Hebei Province, China. *Vertebrata Palasiatica* 37:45–52.
- Sun, G., D. L. Dilcher, H. Wang, and Z. Chen. 2011. A eudicot from the Early Cretaceous of China. *Nature* 471:625–628.
- Tang, F., Z.-X. Luo, Z.-H. Zhou, H.-L. You, J. A. Georgi, Z.-L. Tang, and X.-Z. Wang. 2001. Biostratigraphy and palaeoenvironment of the dinosaur-bearing sediments in Lower Cretaceous of Mazongshan area, Gansu Province, China. *Cretaceous Research* 22:115–129.
- Wan, X., J. Zhao, R. W. Scott, P. Wang, Z. Feng, Q. Huang, and D. Xi. 2013. Late Cretaceous stratigraphy, Songliao Basin, NE China: SK1 cores. *Palaeogeography, Palaeoclimatology, Palaeoecology* 385:31–43.
- Wang, C., Z. Feng, L. Zhang, Y. Huang, K. Cao, P. Wang, and B. Zhao. 2013. Cretaceous paleogeography and paleoclimate and the setting of SKI borehole sites in Songliao Basin, northeast China. *Palaeogeography, Palaeoclimatology, Palaeoecology* 385:17–30.
- Wolfe, D. G., and J. I. Kirkland. 1998. *Zuniceratops christopheri* n. gen. & n. sp., a ceratopsian dinosaur from the Moreno Hill Formation (Cretaceous, Turonian) of west-central New Mexico. *Bulletin of the New Mexico Museum of Natural History and Science* 14:303–317.
- Xu, X., C. A. Forster, J. M. Clark, and J. Mo. 2006. A basal ceratopsian with transitional features from the Late Jurassic of northwestern China. *Proceedings of the Royal Society B: Biological Sciences* 273:2135–2140.
- Zhao, X., Z. Cheng, and X. Xu. 1999. The earliest ceratopsian from the Tuchengzi Formation of Liaoning, China. *Journal of Vertebrate Paleontology* 19:681–691.
- Zhao, X., C. Zhengwu, X. Xu, and P. J. Makovicky. 2006. A new ceratopsian from the Upper Jurassic Houcheng Formation of Hebei, China. *Acta Geologica Sinica* 80:467–473.
