# Supplementary material for: A Ceratopsian Dinosaur from the Lower Cretaceous of Western North America, and the Biogeography of Neoceratopsia
Source: PubMed Central journal article supplement (PMC4262212; doi:10.1371/journal.pone.0112055), 2014-12-10

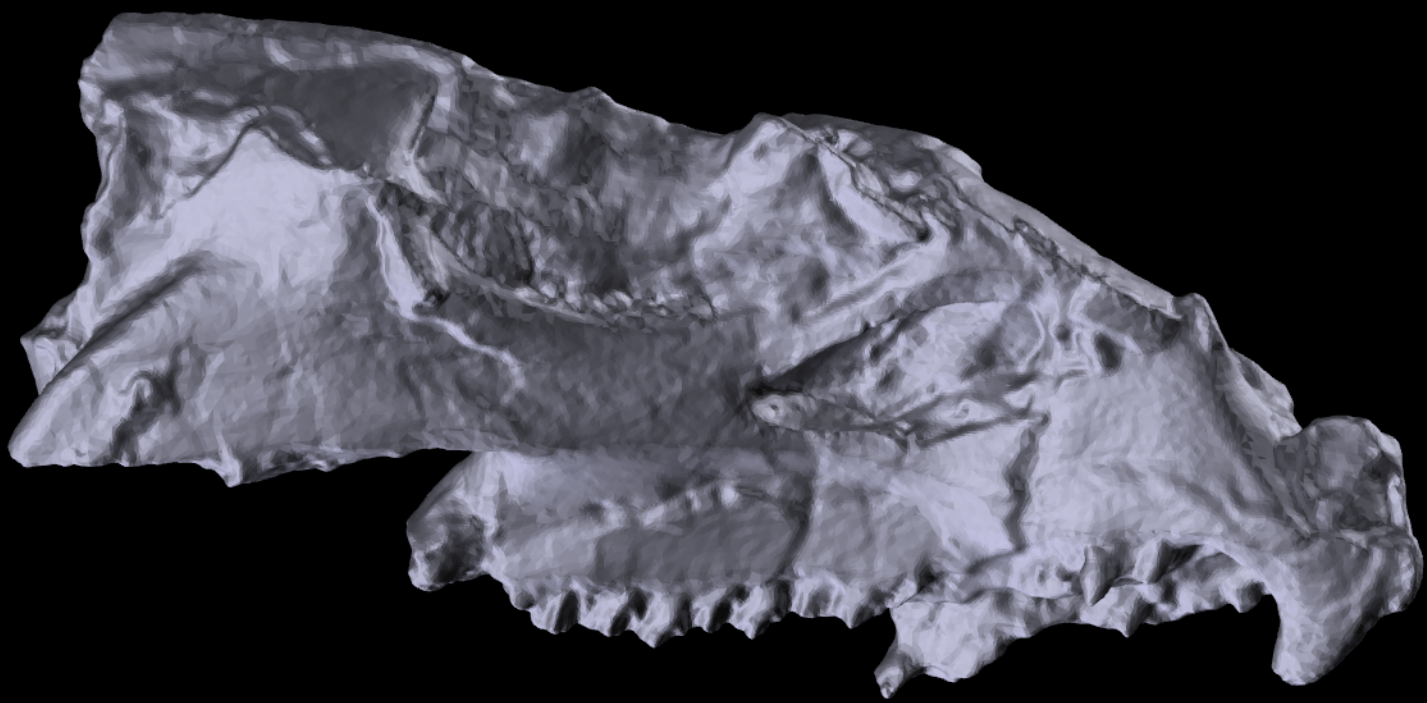

Supplement: pone.0112055.s012.pdf [file pone.0112055.s012.pdf]
